# Supplementary material
Source: PubMed Central journal article supplement (PMC2943322)
Supplement: supp_M110.143545_jbc.M110.143545-1.pdf [file supp_M110.143545_jbc.M110.143545-1.pdf]

# Supplemental Figure S1

## A

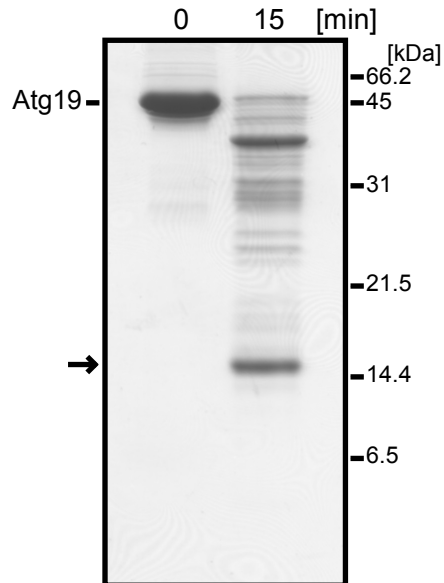

## B

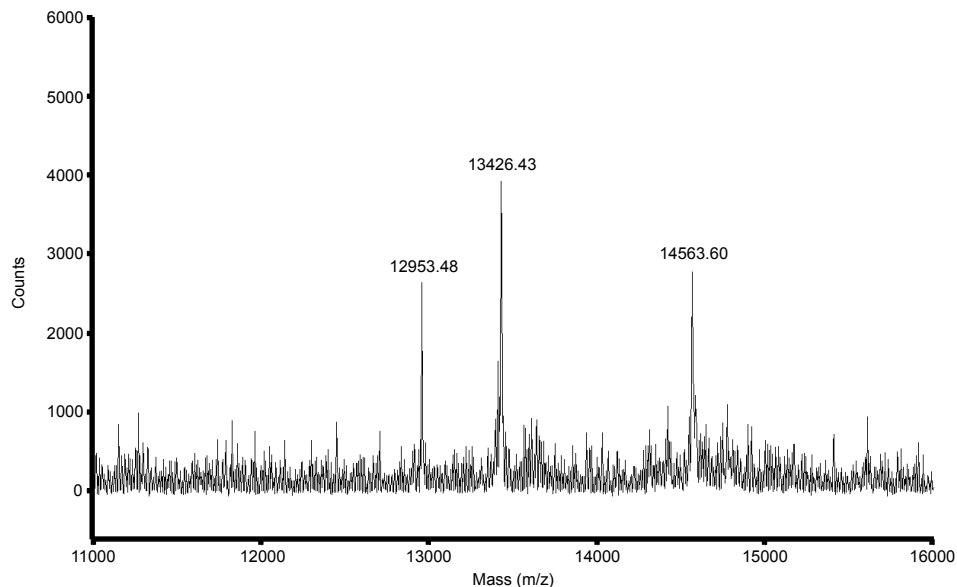

Supplemental Fig. S1. A. Limited proteolysis of Atg19. The Atg19 before and after digestion were subjected to SDS-PAGE, and detected by Coomassie Brilliant Blue staining. Labels of 0 min and 15 min indicate the incubation time of Atg19 with V8 protease. The ~15 kDa product indicated with an arrow was sequenced by a protein sequencer. B. MALDI-TOF mass spectrometry. The 14563.60 m/z peak indicates the N-terminal domain (residues 1-123; calculated molecular mass is 14566.08). The 12953.48 m/z peak indicates the C-terminal domain (residues 254-367; calculated molecular mass is 12953.14). The 13426.43 m/z peak corresponds to the residues 250-367 (calculated molecular mass is 13424.67), which has additional four residues at the N-terminal side of the C-terminal domain.

## Supplemental Figure S2

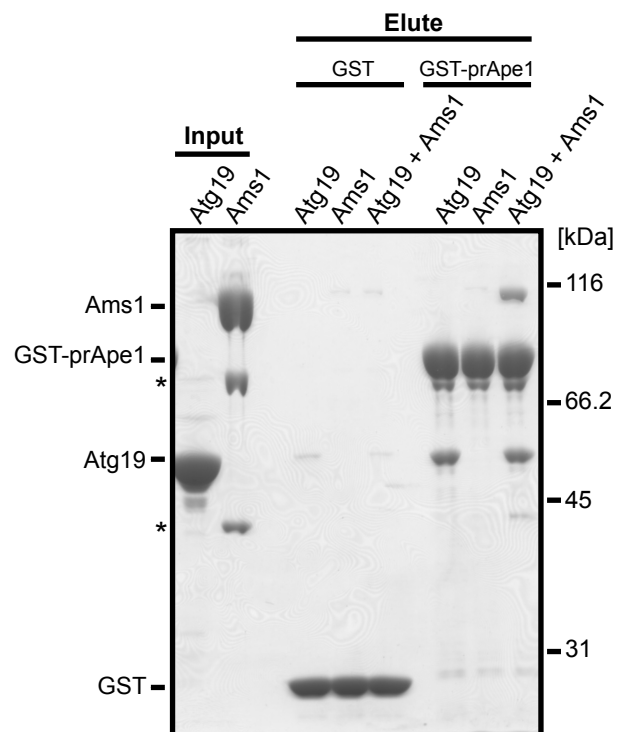

Supplemental Fig. S2. *In vitro* pull-down assay between GST-fused prApe1, Atg19 and Ams1. The input and eluted proteins were subjected to SDS-PAGE and detected by Coomassie Brilliant Blue staining. Asterisks indicate degradation products of Ams1.

# Supplemental Figure S3

A

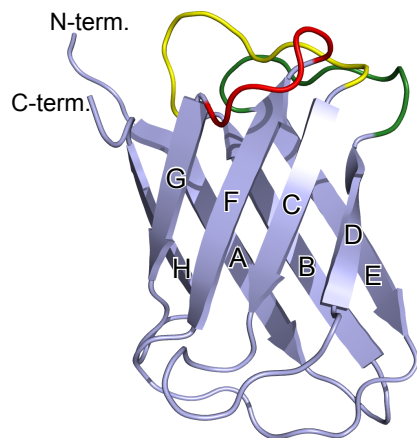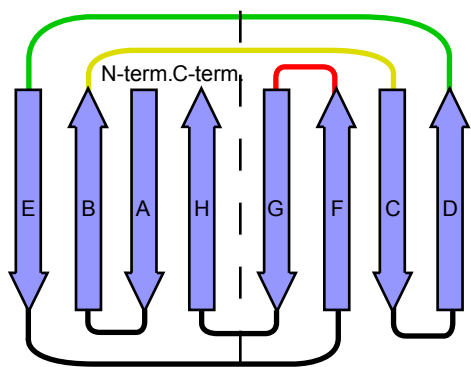

B

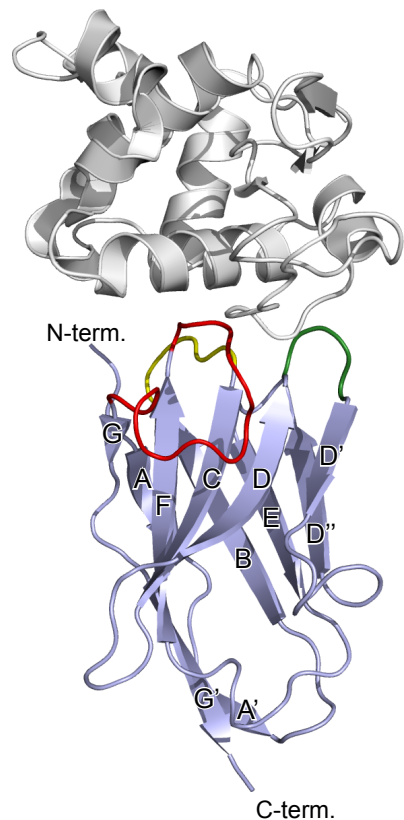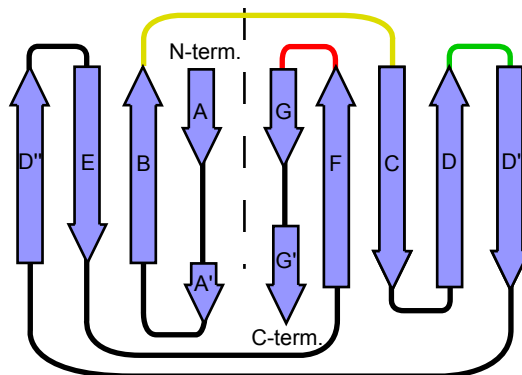

C

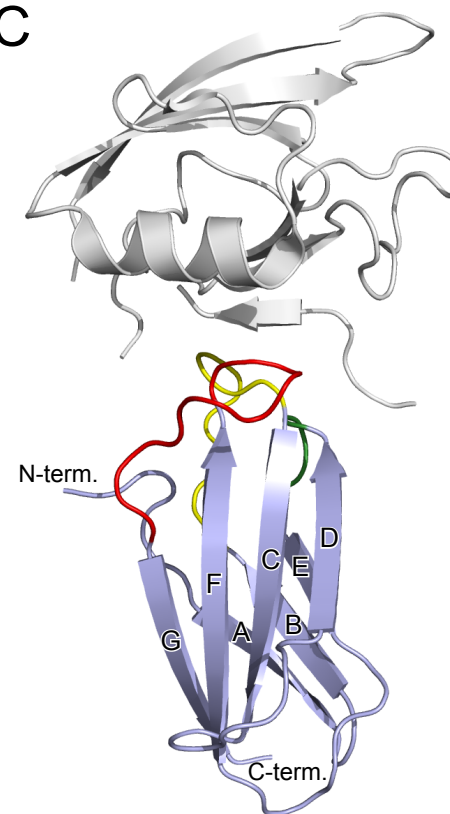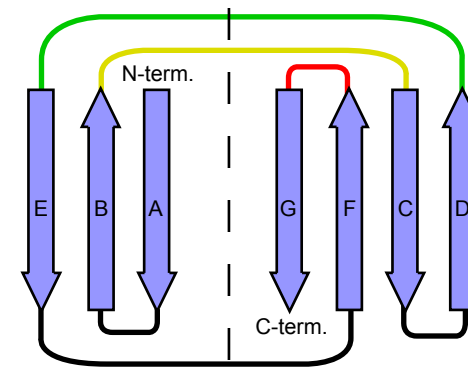

Supplemental Fig. S3. Comparison of the structures of the Atg19 ABD (Left), the heavy chain fragment of the camelid antibody in complex with human lysozyme (Middle; PDB code 1OP9), and human 10th fibronectin type III domain in complex with the PDZ domain of Erbin and the ARVCF peptide (Right; PDB code 2QBW). The BC, DE and FG loops are colored yellow, green and red, respectively. Structures are represented in ribbon diagrams. Topology is shown below each model.
